# Supplementary material
Source: Springer Nature journal article supplement (https://www.springermedizin.de/resource/supplementary/12889_2008_1472_MOESM1_ESM.pdf/9504368)
Supplement: MOESM1 [file 9504368]

**TIME 1**

**400**  
households



**Using pesticides**

**Not using pesticides**

**Left area**

**TIME 2**

**294**

**105**

**1**

**TIME 3**

**362**

**36**

**2**

(Both Times 2 & 3)

(25)

**TIME 4**

**355**

**43**

**2**

(Both Times 3 & 4)

(15)

(Times 2,3, & 4)

(11)
